# Supplementary material for: Anthropogenic Pressure and Climate Change Could Severely Hamper the Avian Metacommunity of the Sicilian Wetlands
Source: MDPI journal article supplement (doi:10.3390/d14090696), 2022-08-23
Supplement: s1 [file s1]

## **Supplementary materials**

### **Anthropogenic pressure and climate change could severely hamper the avian metacommunity of the Sicilian wetlands**

Alessandro FERRARINI <sup>1</sup>, Claudio CELADA <sup>1</sup>, Marco GUSTIN <sup>1</sup>

<sup>1</sup> Lipu-Birdlife Italy, Via Udine 3/a, I-43122 Parma, Italy

**Table S1.** List of the avian species sampled in the Sicilian wetlands.

| ID | Common name               | Scientific name                | Birds (2009/147/EC) Directive |
|----|---------------------------|--------------------------------|-------------------------------|
| 1  | Audouin's Gull            | <i>Larus audouinii</i>         | 1                             |
| 2  | Black Stork               | <i>Ciconia nigra</i>           | 1                             |
| 3  | Black Tern                | <i>Chlidonias niger</i>        | 1                             |
| 4  | Black-crowned Night Heron | <i>Nycticorax nycticorax</i>   | 1                             |
| 5  | Black-headed Gull         | <i>Larus ridibundus</i>        | 0                             |
| 6  | Black-necked Grebe        | <i>Podiceps nigricollis</i>    | 0                             |
| 7  | Black-tailed Godwit       | <i>Limosa limosa</i>           | 0                             |
| 8  | Black-winged Stilt        | <i>Himantopus himantopus</i>   | 1                             |
| 9  | Broad-billed Sandpiper    | <i>Calidris falcinellus</i>    | 0                             |
| 10 | Caspian Tern              | <i>Hydroprogne caspia</i>      | 1                             |
| 11 | Common Greenshank         | <i>Tringa nebularia</i>        | 0                             |
| 12 | Common Kingfisher         | <i>Alcedo atthis</i>           | 1                             |
| 13 | Common Moorhen            | <i>Gallinula chloropus</i>     | 0                             |
| 14 | Common Pochard            | <i>Aythya ferina</i>           | 0                             |
| 15 | Common Redshank           | <i>Tringa totanus</i>          | 0                             |
| 16 | Common Ringed Plover      | <i>Charadrius hiaticula</i>    | 0                             |
| 17 | Common Sandpiper          | <i>Actitis hypoleucos</i>      | 0                             |
| 18 | Common Shelduck           | <i>Tadorna tadorna</i>         | 0                             |
| 19 | Common Snipe              | <i>Galinago gallinago</i>      | 0                             |
| 20 | Common Tern               | <i>Sterna hirundo</i>          | 1                             |
| 21 | Curlew Sandpiper          | <i>Calidris ferruginea</i>     | 0                             |
| 22 | Dunlin                    | <i>Calidris alpina</i>         | 0                             |
| 23 | Eurasian Coot             | <i>Fulica atra</i>             | 0                             |
| 24 | Eurasian Curlew           | <i>Numenius arquata</i>        | 0                             |
| 25 | Eurasian Spoonbill        | <i>Platalea leucorodia</i>     | 1                             |
| 26 | Eurasian Stone-curlew     | <i>Burhinus oedicnemus</i>     | 1                             |
| 27 | Eurasian Teal             | <i>Anas crecca</i>             | 0                             |
| 28 | Eurasian Wigeon           | <i>Mareca penelope</i>         | 0                             |
| 29 | European Golden Plover    | <i>Pluvialis apricaria</i>     | 1                             |
| 30 | Ferruginous Duck          | <i>Aythya nyroca</i>           | 0                             |
| 31 | Gadwall                   | <i>Mareca strepera</i>         | 0                             |
| 32 | Garganey                  | <i>Spatula querquedula</i>     | 0                             |
| 33 | Great Cormorant           | <i>Phalacrocorax carbo</i>     | 0                             |
| 34 | Great Crested Grebe       | <i>Podiceps cristatus</i>      | 0                             |
| 35 | Great Egret               | <i>Ardea alba</i>              | 1                             |
| 36 | Greater Flamingo          | <i>Phoenicopterus roseus</i>   | 1                             |
| 37 | Green Sandpiper           | <i>Tringa ochropus</i>         | 0                             |
| 38 | Grey Heron                | <i>Ardea cinerea</i>           | 0                             |
| 39 | Grey Plover               | <i>Pluvialis squatarola</i>    | 0                             |
| 40 | Gull-billed Tern          | <i>Gelochelidon nilotica</i>   | 1                             |
| 41 | Kentish Plover            | <i>Charadrius alexandrinus</i> | 1                             |
| 42 | Lesser Black-backed Gull  | <i>Larus fuscus</i>            | 0                             |
| 43 | Little Bittern            | <i>Ixobrychus minutus</i>      | 1                             |
| 44 | Little Egret              | <i>Egretta garzetta</i>        | 1                             |
| 45 | Little Grebe              | <i>Tachybaptus ruficollis</i>  | 0                             |

|    |                      |                                    |   |
|----|----------------------|------------------------------------|---|
| 46 | Little Ringed Plover | <i>Charadrius dubius</i>           | 0 |
| 47 | Little Stint         | <i>Calidris minuta</i>             | 0 |
| 48 | Little Tern          | <i>Sternula albifrons</i>          | 1 |
| 49 | Mallard              | <i>Anas platyrhynchos</i>          | 0 |
| 50 | Marbled Duck         | <i>Marmaronetta angustirostris</i> | 1 |
| 51 | Marsh Sandpiper      | <i>Tringa stagnatilis</i>          | 0 |
| 52 | Mediterranean Gull   | <i>Larus melanocephalus</i>        | 1 |
| 53 | Northern Pintail     | <i>Anas acuta</i>                  | 0 |
| 54 | Northern Shoveler    | <i>Spatula clypeata</i>            | 0 |
| 55 | Pied Avocet          | <i>Recurvirostra avosetta</i>      | 1 |
| 56 | Purple Heron         | <i>Ardea purpurea</i>              | 1 |
| 57 | Red knot             | <i>Calidris canutus</i>            | 0 |
| 58 | Ruddy Turnstone      | <i>Arenaria interpres</i>          | 0 |
| 59 | Ruff                 | <i>Calidris pugnax</i>             | 1 |
| 60 | Sandwich Tern        | <i>Thalasseus sandvicensis</i>     | 1 |
| 61 | Slender-billed Gull  | <i>Larus genei</i>                 | 1 |
| 62 | Spotted Redshank     | <i>Tringa erythropus</i>           | 0 |
| 63 | Squacco Heron        | <i>Ardeola ralloides</i>           | 1 |
| 64 | Temminck's Stint     | <i>Calidris temminckii</i>         | 0 |
| 65 | Tufted Duck          | <i>Aythya fuligula</i>             | 0 |
| 66 | Water Rail           | <i>Rallus aquaticus</i>            | 0 |
| 67 | Western Cattle Egret | <i>Bubulcus ibis</i>               | 0 |
| 68 | Western Swampphen    | <i>Porphyrio porphyrio</i>         | 1 |
| 69 | Whimbrel             | <i>Numenius phaeopus</i>           | 0 |
| 70 | Whiskered Tern       | <i>Chlidonias hybrida</i>          | 1 |
| 71 | White Stork          | <i>Ciconia ciconia</i>             | 1 |
| 72 | Wood Sandpiper       | <i>Tringa glareola</i>             | 1 |
| 73 | Yellow-legged Gull   | <i>Larus michahellis</i>           | 0 |

---

**Table S2.** Description of the attributes of the 16 wetlands under study in Sicily.

Isolation was the boundary-to-boundary distance from the closest wetland. Distance to the coastline was the minimum distance from the wetland boundary to the coastline. Water level was assessed with a metric pole at each sampling point, and averaged for each date of sampling. Water-level fluctuation was calculated as standard deviation of the water levels among the dates of sampling. Salinity was evaluated indirectly through the frequency of seawater intrusions observed during field surveys. Tourism pressure measured the level of tourist activities (walking, horse riding, watersports, angling, wildfowling etc.) in the close surroundings of each wetland during field surveys. Anthropization evaluated the occurrence of greenhouses, dumpsites, quarries, camping sites, caravan parks etc. Water diversion and water discharges quantified the presence of active drainage and discharge systems. Salinity and the four attributes related to anthropic pressure were measured on a semi-quantitative scale of 0 to 3 (0 if it was absent, 1 if localized, 2 if scattered, 3 if widespread), using both technical (the authors) and local (the natives, local policymakers and landowners) expertise.

| <b>Wetland</b>  | Wetland size (ha) | Isolation (m) | Distance to the coastline (m) | Mean water level (cm) | Water-level fluctuation (cm) | Salinity | Water diversion | Water discharges | Tourism pressure | Anthropization |
|-----------------|-------------------|---------------|-------------------------------|-----------------------|------------------------------|----------|-----------------|------------------|------------------|----------------|
| Auruca          | 31.4              | 461           | 1,009                         | 0.0                   | 0.0                          | 1        | 3               | 2                | 0                | 3              |
| Baronello       | 20.5              | 461           | 779                           | 24.3                  | 10.7                         | 0        | 1               | 2                | 1                | 2              |
| Cuba            | 61.5              | 208           | 1,499                         | 2.9                   | 3.0                          | 0        | 2               | 0                | 0                | 1              |
| Faro            | 26.9              | 818           | 409                           | 1,849.3               | 1.4                          | 2        | 3               | 2                | 3                | 3              |
| Ganzirri        | 34.1              | 816           | 990                           | 497.6                 | 2.6                          | 2        | 3               | 3                | 3                | 3              |
| Gela            | 107.8             | 65,943        | 2,326                         | 99.5                  | 42.2                         | 0        | 3               | 3                | 1                | 3              |
| Gornalunga      | 13.9              | 63,208        | 0                             | 33.9                  | 11.9                         | 2        | 0               | 2                | 2                | 3              |
| Longarini       | 109.9             | 208           | 1,674                         | 1.2                   | 1.5                          | 3        | 3               | 3                | 3                | 3              |
| Morghella       | 49.6              | 4,798         | 19                            | 0.6                   | 1.2                          | 1        | 3               | 2                | 1                | 3              |
| Pantano Bruno   | 16.5              | 1,419         | 1,162                         | 11.2                  | 6.8                          | 0        | 2               | 2                | 1                | 3              |
| Pantano Grande  | 28.3              | 0             | 274                           | 4.9                   | 3.0                          | 2        | 0               | 0                | 3                | 0              |
| Pantano Piccolo | 15.9              | 0             | 19                            | 26.3                  | 5.0                          | 1        | 0               | 0                | 2                | 0              |
| Preola          | 30.8              | 488           | 1,318                         | 145.6                 | 6.4                          | 0        | 0               | 0                | 1                | 2              |
| Roveto          | 124.1             | 628           | 0                             | 14.1                  | 10.2                         | 3        | 1               | 2                | 1                | 1              |
| Tindari         | 7.4               | 50,349        | 198                           | 200.1                 | 86.4                         | 3        | 0               | 0                | 3                | 0              |
| Tondi           | 6.1               | 488           | 1,916                         | 506.1                 | 17.4                         | 0        | 0               | 0                | 0                | 1              |

**Table S3.** Functional traits of the bird species sampled in the Sicilian wetlands.

*Dietary guilds.* Fish: piscivorous; herbivorous: folivorous, frugivorous and/or granivorous; invertebrates: arthropods and/or other invertebrates; carnivorous: other vertebrates and/or carrion; omnivorous: all the dietary categories together.

*Foraging guilds.* Diver from flight: species that catches food entering the water from flight; diver from the surface: species that catches food entering the water from the surface; intermediate wader: species having tarsometatarsus between 4 and 8 cm; large wader: tarsometatarsus > 8 cm; small wader: tarsometatarsus between 0 and 4 cm; surface feeder: species that collects items of food floating or swimming at the surface.

*Migratory guilds.* Mediterranean: species that remains in the Mediterranean basin; mixed: partly Mediterranean and partly trans-Saharan; sedentary: nonmigratory; trans-Saharan: species that breeds in Europe and overwinters in sub-Saharan Africa.

| Species                   | Dietary guilds                 | Foraging guilds        | Migratory guilds |
|---------------------------|--------------------------------|------------------------|------------------|
| Audouin's Gull            | fish                           | surface feeder         | mixed            |
| Black Stork               | fish                           | large wader            | trans-Saharan    |
| Black Tern                | invertebrates                  | diver from flight      | trans-Saharan    |
| Black-crowned Night Heron | fish-invertebrates             | intermediate wader     | trans-Saharan    |
| Black-headed Gull         | fish-invertebrates-carnivorous | surface feeder         | Mediterranean    |
| Black-necked Grebe        | invertebrates                  | diver from the surface | Mediterranean    |
| Black-tailed Godwit       | invertebrates                  | intermediate wader     | trans-Saharan    |
| Black-winged Stilt        | invertebrates                  | large wader            | trans-Saharan    |
| Broad-billed Sandpiper    | herbivorous -invertebrates     | small wader            | trans-Saharan    |
| Caspian Tern              | fish                           | diver from flight      | trans-Saharan    |
| Common Greenshank         | fish-invertebrates             | intermediate wader     | mixed            |
| Common Kingfisher         | fish                           | diver from flight      | Mediterranean    |
| Common Moorhen            | herbivorous -invertebrates     | surface feeder         | sedentary        |
| Common Pochard            | herbivorous -invertebrates     | diver from the surface | mixed            |
| Common Redshank           | invertebrates                  | intermediate wader     | mixed            |
| Common Ringed Plover      | invertebrates                  | small wader            | trans-Saharan    |
| Common Sandpiper          | invertebrates                  | small wader            | mixed            |
| Common Shelduck           | invertebrates                  | surface feeder         | Mediterranean    |
| Common Snipe              | invertebrates                  | small wader            | mixed            |
| Common Tern               | fish-invertebrates             | diver from flight      | trans-Saharan    |
| Curlew Sandpiper          | invertebrates                  | small wader            | trans-Saharan    |
| Dunlin                    | invertebrates                  | small wader            | Mediterranean    |
| Eurasian Coot             | herbivorous -invertebrates     | surface feeder         | Mediterranean    |
| Eurasian Curlew           | herbivorous -invertebrates     | large wader            | mixed            |
| Eurasian Spoonbill        | fish-invertebrates             | large wader            | mixed            |
| Eurasian Stone-curlew     | invertebrates                  | intermediate wader     | mixed            |
| Eurasian Teal             | herbivorous -invertebrates     | surface feeder         | mixed            |
| Eurasian Wigeon           | herbivorous                    | surface feeder         | mixed            |
| European Golden Plover    | herbivorous -invertebrates     | intermediate wader     | mixed            |
| Ferruginous Duck          | herbivorous                    | diver from the surface | mixed            |
| Gadwall                   | herbivorous                    | surface feeder         | mixed            |
| Garganey                  | herbivorous -invertebrates     | surface feeder         | trans-Saharan    |
| Great Cormorant           | fish                           | diver from the surface | Mediterranean    |

|                          |                                |                        |               |
|--------------------------|--------------------------------|------------------------|---------------|
| Great Crested Grebe      | fish                           | diver from the surface | Mediterranean |
| Great Egret              | fish-invertebrates-carnivorous | large wader            | Mediterranean |
| Greater Flamingo         | invertebrates                  | large wader            | sedentary     |
| Green Sandpiper          | invertebrates                  | small wader            | mixed         |
| Grey Heron               | fish-invertebrates-carnivorous | large wader            | Mediterranean |
| Grey Plover              | invertebrates                  | intermediate wader     | Mediterranean |
| Gull-billed Tern         | fish-invertebrates-carnivorous | diver from flight      | trans-Saharan |
| Kentish Plover           | invertebrates                  | small wader            | mixed         |
| Lesser Black-backed Gull | omnivorous                     | surface feeder         | mixed         |
| Little Bittern           | fish-invertebrates             | intermediate wader     | trans-Saharan |
| Little Egret             | fish-invertebrates             | large wader            | Mediterranean |
| Little Grebe             | fish-invertebrates             | diver from the surface | Mediterranean |
| Little Ringed Plover     | invertebrates                  | small wader            | trans-Saharan |
| Little Stint             | invertebrates                  | small wader            | trans-Saharan |
| Little Tern              | fish-invertebrates             | diver from flight      | trans-Saharan |
| Mallard                  | herbivorous -invertebrates     | surface feeder         | sedentary     |
| Marbled Duck             | herbivorous -invertebrates     | surface feeder         | trans-Saharan |
| Marsh Sandpiper          | invertebrates                  | intermediate wader     | trans-Saharan |
| Mediterranean Gull       | fish-invertebrates-carnivorous | surface feeder         | Mediterranean |
| Northern Pintail         | herbivorous -invertebrates     | surface feeder         | mixed         |
| Northern Shoveler        | herbivorous -invertebrates     | surface feeder         | mixed         |
| Pied Avocet              | invertebrates                  | large wader            | mixed         |
| Purple Heron             | fish-invertebrates             | large wader            | trans-Saharan |
| Red knot                 | herbivorous -invertebrates     | small wader            | trans-Saharan |
| Ruddy Turnstone          | invertebrates                  | small wader            | mixed         |
| Ruff                     | herbivorous -invertebrates     | intermediate wader     | trans-Saharan |
| Sandwich Tern            | fish                           | diver from flight      | mixed         |
| Slender-billed Gull      | fish-invertebrates-carnivorous | surface feeder         | Mediterranean |
| Spotted Redshank         | fish-invertebrates             | intermediate wader     | trans-Saharan |
| Squacco Heron            | fish-invertebrates             | intermediate wader     | trans-Saharan |
| Temminck's Stint         | invertebrates                  | small wader            | trans-Saharan |
| Tufted Duck              | herbivorous -invertebrates     | diver from the surface | mixed         |
| Water Rail               | omnivorous                     | surface feeder         | Mediterranean |
| Western Cattle Egret     | invertebrates                  | intermediate wader     | Mediterranean |
| Western Swamphen         | herbivorous -invertebrates     | surface feeder         | sedentary     |
| Whimbrel                 | herbivorous -invertebrates     | intermediate wader     | trans-Saharan |
| Whiskered Tern           | fish-invertebrates             | diver from flight      | trans-Saharan |
| White Stork              | fish-invertebrates-carnivorous | large wader            | trans-Saharan |
| Wood Sandpiper           | invertebrates                  | small wader            | trans-Saharan |
| Yellow-legged Gull       | omnivorous                     | surface feeder         | sedentary     |

---

**Table S4.** Pairwise dissimilarities in species composition (i.e. pairwise beta diversity) between wetlands, measured using Jaccard's dissimilarity index for binary data (species presences-absences).

|                 | Auruca | Baronello | Cuba | Faro | Ganzimi | Gela | Gomalunga | Longarini | Morghella | Pantano Bruno | Pantano Grande | Pantano Piccolo | Preola | Roveto | Tindari | Tondi |
|-----------------|--------|-----------|------|------|---------|------|-----------|-----------|-----------|---------------|----------------|-----------------|--------|--------|---------|-------|
| Auruca          |        | 1.00      | 1.00 | 1.00 | 0.94    | 0.98 | 1.00      | 1.00      | 1.00      | 1.00          | 1.00           | 0.94            | 0.95   | 0.98   | 1.00    | 1.00  |
| Baronello       | 1.00   |           | 0.67 | 0.86 | 0.71    | 0.57 | 0.53      | 0.80      | 0.96      | 0.62          | 0.55           | 0.67            | 0.68   | 0.60   | 0.88    | 0.78  |
| Cuba            | 1.00   | 0.67      |      | 0.91 | 0.83    | 0.73 | 0.70      | 0.72      | 1.00      | 0.57          | 0.48           | 0.75            | 0.90   | 0.57   | 0.86    | 0.91  |
| Faro            | 1.00   | 0.86      | 0.91 |      | 0.70    | 0.78 | 0.89      | 0.83      | 0.92      | 0.90          | 0.82           | 0.93            | 0.87   | 0.88   | 0.76    | 0.91  |
| Ganzimi         | 0.94   | 0.71      | 0.83 | 0.70 |         | 0.72 | 0.71      | 0.75      | 0.94      | 0.80          | 0.72           | 0.73            | 0.73   | 0.79   | 0.68    | 0.83  |
| Gela            | 0.98   | 0.57      | 0.73 | 0.78 | 0.72    |      | 0.51      | 0.89      | 0.98      | 0.78          | 0.76           | 0.74            | 0.57   | 0.53   | 0.86    | 0.77  |
| Gomalunga       | 1.00   | 0.53      | 0.70 | 0.89 | 0.71    | 0.51 |           | 0.88      | 1.00      | 0.66          | 0.70           | 0.63            | 0.64   | 0.60   | 0.84    | 0.66  |
| Longarini       | 1.00   | 0.80      | 0.72 | 0.83 | 0.75    | 0.89 | 0.88      |           | 1.00      | 0.77          | 0.60           | 0.86            | 0.93   | 0.85   | 0.77    | 0.94  |
| Morghella       | 1.00   | 0.96      | 1.00 | 0.92 | 0.94    | 0.98 | 1.00      | 1.00      |           | 1.00          | 0.95           | 1.00            | 0.95   | 0.98   | 1.00    | 1.00  |
| Pantano Bruno   | 1.00   | 0.62      | 0.57 | 0.90 | 0.80    | 0.78 | 0.66      | 0.77      | 1.00      |               | 0.56           | 0.83            | 0.86   | 0.66   | 0.83    | 0.89  |
| Pantano Grande  | 1.00   | 0.55      | 0.48 | 0.82 | 0.72    | 0.76 | 0.70      | 0.60      | 0.95      | 0.56          |                | 0.71            | 0.83   | 0.64   | 0.83    | 0.89  |
| Pantano Piccolo | 0.94   | 0.67      | 0.75 | 0.93 | 0.73    | 0.74 | 0.63      | 0.86      | 1.00      | 0.83          | 0.71           |                 | 0.63   | 0.76   | 0.80    | 0.77  |
| Preola          | 0.95   | 0.68      | 0.90 | 0.87 | 0.73    | 0.57 | 0.64      | 0.93      | 0.95      | 0.86          | 0.83           | 0.63            |        | 0.74   | 0.88    | 0.61  |
| Roveto          | 0.98   | 0.60      | 0.57 | 0.88 | 0.79    | 0.53 | 0.60      | 0.85      | 0.98      | 0.66          | 0.64           | 0.76            | 0.74   |        | 0.91    | 0.81  |
| Tindari         | 1.00   | 0.88      | 0.86 | 0.76 | 0.68    | 0.86 | 0.84      | 0.77      | 1.00      | 0.83          | 0.83           | 0.80            | 0.88   | 0.91   |         | 0.81  |
| Tondi           | 1.00   | 0.78      | 0.91 | 0.91 | 0.83    | 0.77 | 0.66      | 0.94      | 1.00      | 0.89          | 0.89           | 0.77            | 0.61   | 0.81   | 0.81    |       |

**Figure S1.** Nested distributions of the 73 avian species (columns) at the 16 wetlands (rows) in Sicily during the summer period (July-September). Yellow squares indicate species presence, blue ones indicate absence. IDs of bird species are the same as those in Supplementary Table S1. The topmost site (Roveto) was the most hospitable, the lowermost (Morghella) the least hospitable. The leftmost species (ID 38; Grey Heron *Ardea cinerea*) was the one whose niche requirements were most commonly and consistently met, the rightmost one (ID 57; Red knot *Calidris canutus*) was the rarest species.

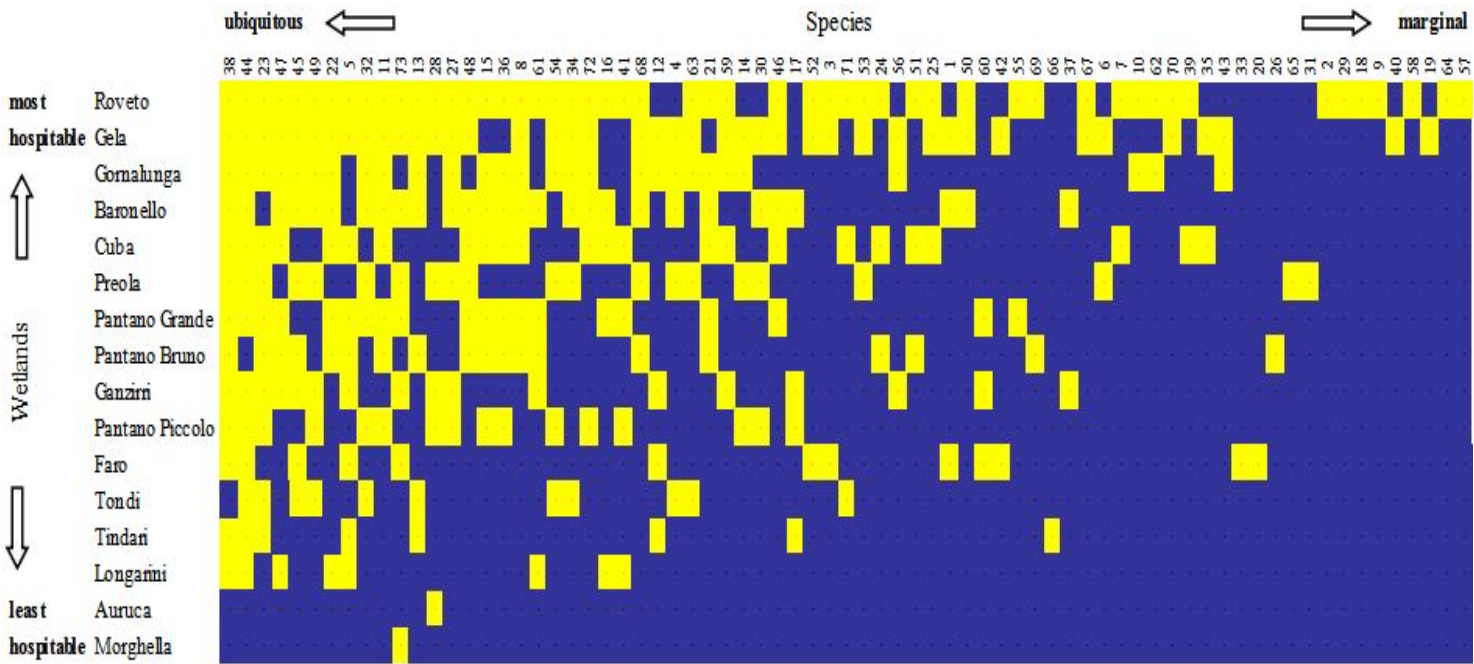

**Table S5.** Idiosyncratic wetlands in Sicily.

| <b>Wetland</b>  | <b>Idiosyncratic index (<i>T</i>)</b> |
|-----------------|---------------------------------------|
| Faro            | 29.43                                 |
| Longarini       | 24.99                                 |
| Preola          | 22.29                                 |
| Tindari         | 20.43                                 |
| Gela            | 18.97                                 |
| Tondi           | 17.68                                 |
| Auruca          | 17.51                                 |
| Pantano Bruno   | 15.75                                 |
| Pantano Piccolo | 15.59                                 |
| Cuba            | 14.18                                 |
| Roveto          | 13.25                                 |
| Ganzirri        | 10.59                                 |
| Gornalunga      | 8.96                                  |
| Morghella       | 7.52                                  |
| Pantano Grande  | 6.04                                  |
| Baronello       | 5.96                                  |

**Table S6.** Idiosyncratic bird species in the Sicilian wetlands.

| <b>Bird Species</b>       | <b>Idiosyncratic index (<i>T</i>)</b> |
|---------------------------|---------------------------------------|
| Eurasian Wigeon           | 90.88                                 |
| Common Sandpiper          | 52.98                                 |
| Kentish Plover            | 46.98                                 |
| Yellow-legged Gull        | 42.81                                 |
| Slender-billed Gull       | 38.85                                 |
| Common Kingfisher         | 38.74                                 |
| Common Ringed Plover      | 38.61                                 |
| Common Tern               | 37.48                                 |
| Gadwall                   | 37.02                                 |
| Eurasian Stone-curlew     | 36.84                                 |
| Great Cormorant           | 35.25                                 |
| Sandwich Tern             | 34.00                                 |
| Tufted Duck               | 33.87                                 |
| Water Rail                | 33.59                                 |
| Common Snipe              | 30.90                                 |
| Black-headed Gull         | 27.24                                 |
| Green Sandpiper           | 25.19                                 |
| Black-crowned Night Heron | 22.71                                 |
| White Stork               | 21.32                                 |
| Ferruginous Duck          | 19.38                                 |
| Gull-billed Tern          | 18.96                                 |
| Common Pochard            | 18.33                                 |
| Common Moorhen            | 18.01                                 |
| Northern Shoveler         | 17.80                                 |
| Audouin's Gull            | 17.33                                 |
| Lesser Black-backed Gull  | 16.31                                 |
| Squacco Heron             | 16.04                                 |
| Great Egret               | 14.39                                 |
| Black-necked Grebe        | 13.85                                 |
| Dunlin                    | 12.30                                 |
| Great Crested Grebe       | 12.13                                 |
| Mallard                   | 12.01                                 |
| Whimbrel                  | 11.97                                 |
| Purple Heron              | 11.47                                 |
| Little Grebe              | 11.04                                 |
| Grey Plover               | 10.48                                 |
| Little Bittern            | 10.30                                 |
| Greater Flamingo          | 10.18                                 |
| Common Redshank           | 9.92                                  |
| Eurasian Coot             | 9.80                                  |

|                        |      |
|------------------------|------|
| Little Stint           | 9.51 |
| Pied Avocet            | 9.14 |
| Black Tern             | 9.11 |
| Mediterranean Gull     | 8.87 |
| Marsh Sandpiper        | 7.69 |
| Garganey               | 7.68 |
| Wood Sandpiper         | 7.01 |
| Eurasian Curlew        | 6.56 |
| Black-tailed Godwit    | 6.10 |
| Curlew Sandpiper       | 5.87 |
| Little Egret           | 5.40 |
| Eurasian Teal          | 5.35 |
| Ruff                   | 4.13 |
| Spotted Redshank       | 3.78 |
| Little Tern            | 3.49 |
| Caspian Tern           | 3.13 |
| Marbled Duck           | 3.03 |
| Common Greenshank      | 2.78 |
| Little Ringed Plover   | 2.42 |
| Grey Heron             | 2.40 |
| Northern Pintail       | 2.24 |
| Western Swamphen       | 1.76 |
| Eurasian Spoonbill     | 0.83 |
| Whiskered Tern         | 0.67 |
| Black-winged Stilt     | 0.36 |
| Western Cattle Egret   | 0.02 |
| Black Stork            | 0    |
| Broad-billed Sandpiper | 0    |
| Common Shelduck        | 0    |
| European Golden Plover | 0    |
| Red knot               | 0    |
| Ruddy Turnstone        | 0    |
| Temminck's Stint       | 0    |

---

**Figure S2.** Results of 10,000 null model simulations for the two indices C-score ( $C$ ) and number of checkerboard species pairs ( $N_c$ ).  $C^{obs}$  was 3.934, and resulted nonsignificant (mean of  $C^{sim} = 3.864$ ; variance of  $C^{sim} = 0.002$ ;  $p(C^{obs} \leq C^{sim}) = 0.896$ ;  $p(C^{obs} \geq C^{sim}) = 0.104$ ).  $N_c^{obs}$  was 637, and was not significant as well (mean of  $N_c^{sim} = 603.29$ ; variance of  $N_c^{sim} = 1137.30$ ;  $p(N_c^{obs} \leq N_c^{sim}) = 0.838$ ;  $p(N_c^{obs} \geq N_c^{sim}) = 0.162$ ).

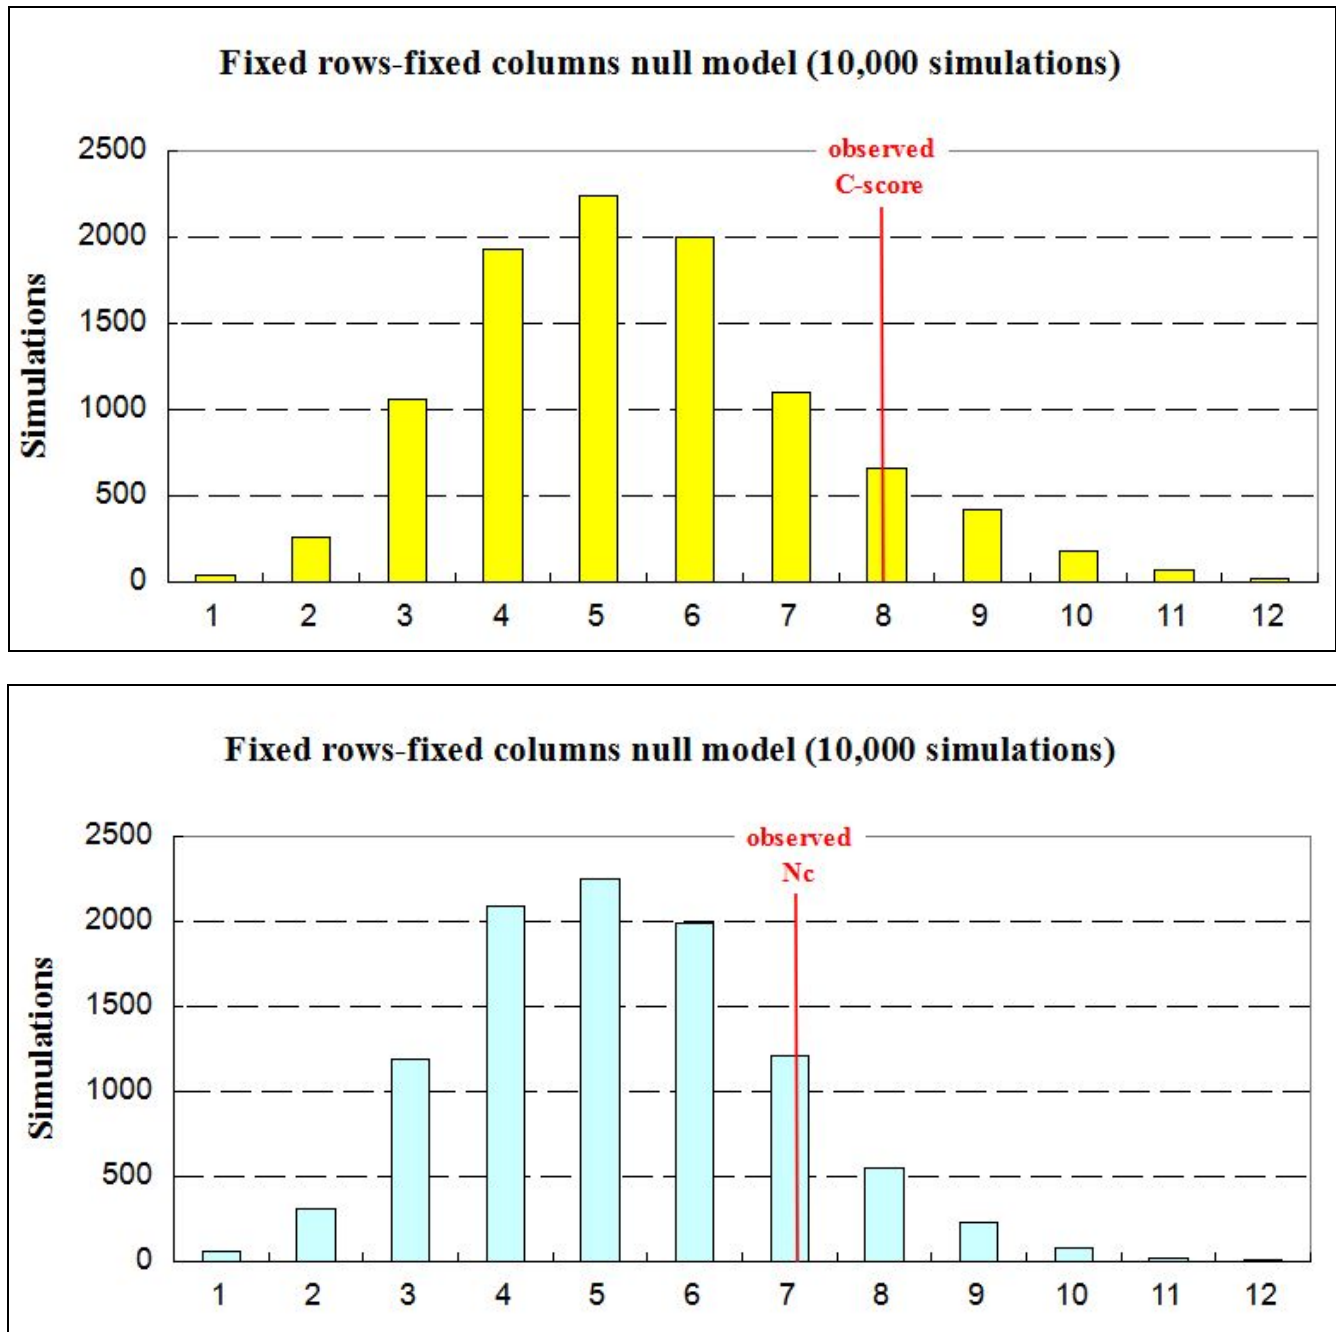

**Table S7.** Cross-tabulation analysis of species guilds. A) number of bird species belonging to different dietary (rows) and foraging (columns) guilds. B) number of bird species belonging to different dietary (rows) and migratory (columns) guilds. C) number of bird species belonging to different foraging (rows) and migratory (columns) guilds. If no number is given, there were no species for that particular row-column combination.

A)

|                                | diver from flight | diver from the surface | intermediate wader | large wader | small wader | surface feeder | Grand Total |
|--------------------------------|-------------------|------------------------|--------------------|-------------|-------------|----------------|-------------|
| fish                           | 3                 | 2                      |                    | 1           |             | 1              | 7           |
| fish-invertebrates             | 3                 | 1                      | 5                  | 3           |             |                | 12          |
| fish-invertebrates-carnivorous | 1                 |                        |                    | 3           |             | 3              | 7           |
| herbivorous                    |                   | 1                      |                    |             |             | 2              | 3           |
| herbivorous-invertebrates      |                   | 2                      | 3                  | 1           | 2           | 9              | 17          |
| invertebrates                  | 1                 | 1                      | 6                  | 3           | 12          | 1              | 24          |
| omnivorous                     |                   |                        |                    |             |             | 3              | 3           |
| <b>Grand Total</b>             | 8                 | 7                      | 14                 | 11          | 14          | 19             |             |

B)

|                                | Mediterranean | mixed | sedentary | trans-Saharan | Grand Total |
|--------------------------------|---------------|-------|-----------|---------------|-------------|
| fish                           | 3             | 2     |           | 2             | 7           |
| fish-invertebrates             | 2             | 2     |           | 8             | 12          |
| fish-invertebrates-carnivorous | 5             |       |           | 2             | 7           |
| herbivorous                    |               | 3     |           |               | 3           |
| herbivorous-invertebrates      | 1             | 7     | 3         | 6             | 17          |
| invertebrates                  | 5             | 8     | 1         | 10            | 24          |
| omnivorous                     | 1             | 1     | 1         |               | 3           |
| <b>Grand Total</b>             | 17            | 23    | 5         | 28            |             |

C)

|                        | Mediterranean | mixed | sedentary | trans-Saharan | Grand Total |
|------------------------|---------------|-------|-----------|---------------|-------------|
| diver from flight      | 1             | 1     |           | 6             | 8           |
| diver from the surface | 4             | 3     |           |               | 7           |
| intermediate wader     | 2             | 4     |           | 8             | 14          |
| large wader            | 3             | 3     | 1         | 4             | 11          |
| small wader            | 1             | 5     |           | 8             | 14          |
| surface feeder         | 6             | 7     | 4         | 2             | 19          |
| <b>Grand Total</b>     | 17            | 23    | 5         | 28            |             |

**Table S8.** Boundary-to-boundary distances (in meters) between the wetlands under study.

|                 | Auruca  | Baronello | Cuba    | Faro    | Ganzirri | Gela    | Gornalunga | Longarini | Morghella | Pantano<br>bruno | Pantano<br>grande | Pantano<br>piccolo | Preola  | Roveto  | Tindari | Tondi   |
|-----------------|---------|-----------|---------|---------|----------|---------|------------|-----------|-----------|------------------|-------------------|--------------------|---------|---------|---------|---------|
| Auruca          |         | 461       | 2,597   | 182,918 | 181,294  | 72,253  | 77,194     | 3,781     | 4,798     | 5,993            | 13,171            | 13,863             | 237,457 | 10,315  | 160,869 | 236,572 |
| Baronello       | 461     |           | 3,520   | 184,250 | 182,629  | 72,990  | 78,566     | 4,702     | 4,980     | 6,577            | 14,504            | 15,187             | 238,145 | 11,655  | 162,239 | 237,258 |
| Cuba            | 2,597   | 3,520     |         | 181,137 | 179,478  | 68,666  | 74,744     | 208       | 7,038     | 3,382            | 11,752            | 12,527             | 233,947 | 8,973   | 158,309 | 233,066 |
| Faro            | 182,918 | 184,250   | 181,137 |         | 817      | 179,374 | 109,279    | 181,234   | 179,723   | 183,729          | 169,042           | 168,276            | 272,573 | 170,312 | 52,806  | 272,359 |
| Ganzirri        | 181,294 | 182,629   | 179,478 | 817     |          | 177,112 | 107,341    | 179,545   | 178,155   | 182,032          | 167,423           | 166,658            | 270,121 | 168,685 | 50,349  | 269,905 |
| Gela            | 72,253  | 72,990    | 68,666  | 179,374 | 177,112  |         | 76,810     | 66,466    | 75,966    | 65,943           | 70,096            | 70,594             | 163,200 | 69,922  | 138,559 | 162,339 |
| Gornalunga      | 77,194  | 78,566    | 74,744  | 109,279 | 107,341  | 76,810  |            | 74,269    | 75,373    | 76,569           | 63,897            | 63,208             | 216,805 | 64,950  | 83,253  | 216,194 |
| Longarini       | 3,781   | 4,702     | 208     | 181,234 | 179,545  | 66,466  | 74,269     |           | 8,032     | 1,419            | 12,284            | 13,081             | 231,743 | 9,569   | 157,675 | 230,862 |
| Morghella       | 4,798   | 4,980     | 7,038   | 179,723 | 178,155  | 75,966  | 75,373     | 8,032     |           | 11,066           | 10,909            | 11,412             | 241,366 | 8,538   | 159,142 | 240,493 |
| Pantano bruno   | 5,993   | 6,577     | 3,382   | 183,729 | 182,032  | 65,943  | 76,569     | 1,419     | 11,066    |                  | 15,223            | 16,057             | 230,990 | 12,652  | 159,877 | 230,100 |
| Pantano grande  | 13,171  | 14,504    | 11,752  | 169,042 | 167,423  | 70,096  | 63,897     | 12,284    | 10,909    | 15,223           |                   | 0                  | 235,334 | 628     | 147,663 | 234,491 |
| Pantano piccolo | 13,863  | 15,187    | 12,527  | 168,276 | 166,658  | 70,594  | 63,208     | 13,081    | 11,412    | 16,057           | 0                 |                    | 235,743 | 1,434   | 146,977 | 234,904 |
| Preola          | 237,457 | 238,145   | 233,947 | 272,573 | 270,121  | 163,200 | 216,805    | 231,743   | 241,366   | 230,990          | 235,334           | 235,743            |         | 235,229 | 219,265 | 488     |
| Roveto          | 10,315  | 11,655    | 8,973   | 170,312 | 168,685  | 69,922  | 64,950     | 9,569     | 8,538     | 12,652           | 628               | 1,434              | 235,229 |         | 148,707 | 234,383 |
| Tindari         | 160,869 | 162,239   | 158,309 | 52,806  | 50,349   | 138,559 | 83,253     | 157,675   | 159,142   | 159,877          | 147,663           | 146,977            | 219,265 | 148,707 |         | 219,049 |
| Tondi           | 236,572 | 237,258   | 233,066 | 272,359 | 269,905  | 162,339 | 216,194    | 230,862   | 240,493   | 230,100          | 234,491           | 234,904            | 488     | 234,383 | 219,049 |         |

**Table S9.** List of the bird species with three or less occurrences out of 16 wetlands.

| Species                  | Occurrences |
|--------------------------|-------------|
| Audouin's Gull           | 3           |
| Black Tern               | 3           |
| Eurasian Curlew          | 3           |
| Eurasian Spoonbill       | 3           |
| Marbled Duck             | 3           |
| Marsh Sandpiper          | 3           |
| Mediterranean Gull       | 3           |
| Northern Pintail         | 3           |
| Purple Heron             | 3           |
| Sandwich Tern            | 3           |
| White Stork              | 3           |
| Black-necked Grebe       | 2           |
| Black-tailed Godwit      | 2           |
| Caspian Tern             | 2           |
| Great Egret              | 2           |
| Green Sandpiper          | 2           |
| Grey Plover              | 2           |
| Lesser Black-backed Gull | 2           |
| Little Bittern           | 2           |
| Pied Avocet              | 2           |
| Spotted Redshank         | 2           |
| Western Cattle Egret     | 2           |
| Whimbrel                 | 2           |
| Whiskered Tern           | 2           |
| Black Stork              | 1           |
| Broad-billed Sandpiper   | 1           |
| Common Shelduck          | 1           |
| Common Snipe             | 1           |
| Common Tern              | 1           |
| Eurasian Stone-curlew    | 1           |
| European Golden Plover   | 1           |
| Gadwall                  | 1           |
| Great Cormorant          | 1           |
| Gull-billed Tern         | 1           |
| Red knot                 | 1           |
| Ruddy Turnstone          | 1           |
| Temminck's Stint         | 1           |
| Tufted Duck              | 1           |
| Water Rail               | 1           |
