# Supplementary material for: Anthropogenic Pressure and Climate Change Could Severely Hamper the Avian Metacommunity of the Sicilian Wetlands
Source: MDPI journal article supplement (doi:10.3390/d14090696), 2022-08-23
Supplement: s1 [file s1]

Archive with 1 entries (1 files):
- diversity-1867328-supplementary.pdf
